# Supplementary material for: Photopolymerized poly(l-lactide-b-N-vinyl-2-pyrrolidone) network resists cell adhesion in situ
Source: Royal Society of Chemistry journal article supplement (doi:10.1039/d1ra00554e), 2021-01-01
Supplement: d1ra00554e1.pdf [file d1ra00554e1.pdf]

## Supporting Information

### Photopolymerized poly(L-lactide-*b*-N-vinyl-2-pyrrolidone) network resist cell adhesion in situ

Yong Wang<sup>1,2</sup>, Xiaorong Lan<sup>2</sup>, Shuyin Zuo<sup>1,2</sup>, Yafeng Zou<sup>2</sup>, Sai Li<sup>1</sup>, Zhonglan Tang<sup>2,3\*</sup>  
and Yunbing Wang<sup>2</sup>

1. School of Chemical Engineering, Sichuan University.
2. National Engineering Research Center for Biomaterials, Sichuan University.
3. Institute of Regulatory Science for Medical Device, Sichuan University.

\* Corresponding Author

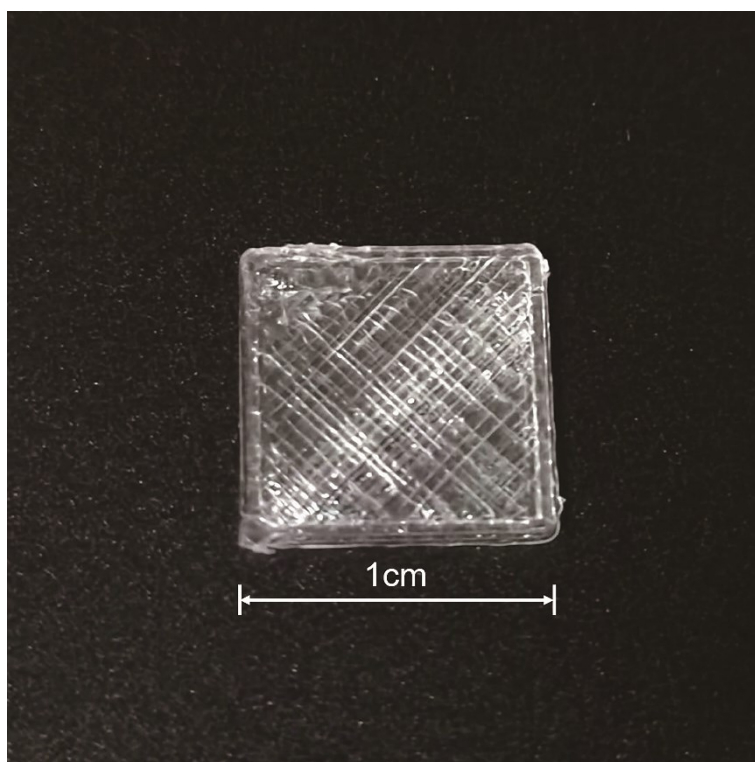

Fig S1 Pure PLLA sheets formed by FDM printing.

PLLA sheets was used as a control sample. Its production method: processed from pure PLLA pellets (molecular weight: 200,000) which were formed into linear materials in a mini extruder, and finally printed by an FDM 3D printer to form PLLA sheets.
